# Supplementary material for: A floating top-electrode electrowetting-on-dielectric system
Source: Royal Society of Chemistry journal article supplement (doi:10.1039/c9ra09491a), 2020-01-01

## Supplementary Information

### A floating top-plate electrowetting-on-dielectric system

|           |                        |
|-----------|------------------------|
| Figure S1 | FEM simulation results |
|-----------|------------------------|

## Supplementary Figure 1

Full FEM simulation results of grounded top-plate groups (a), (c), (e) and (g); and floating top-plate groups (b), (d), (f) and (h).

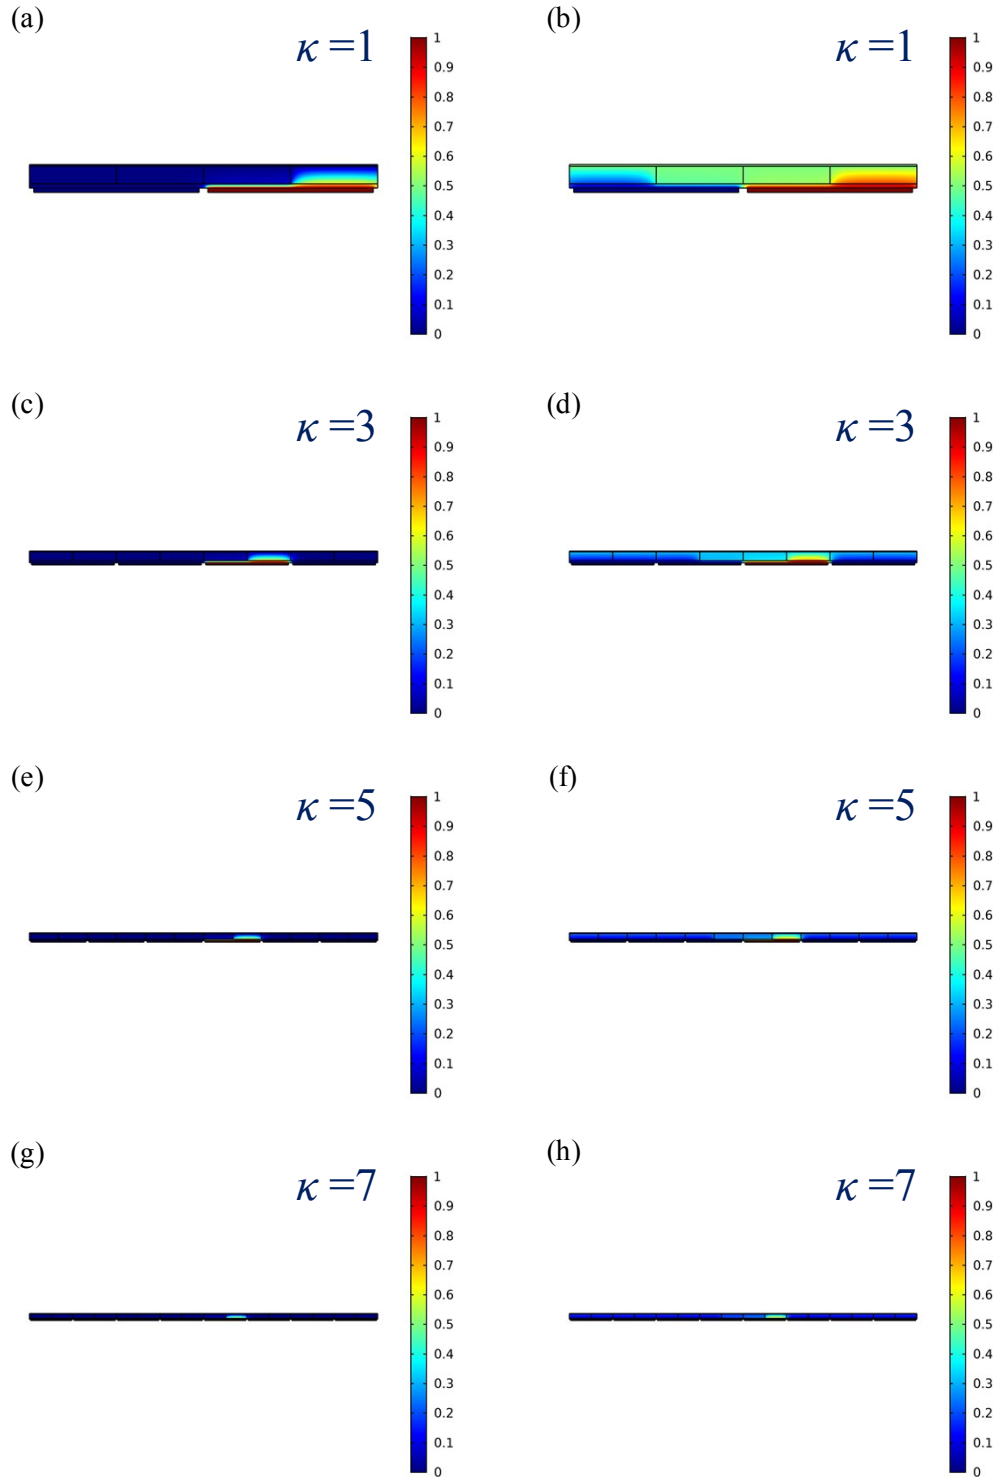

Supplement: c9ra09491a2.pdf [file c9ra09491a2.pdf]
